# Supplementary material for: Effects of Temperature on Enantiomerization Energy and Distribution of Isomers in the Chiral Cu13 Cluster
Source: MDPI journal article supplement (doi:10.3390/molecules26185710), 2021-09-21
Supplement: s1 [file s1]

# Effects of Temperature on Enantiomerization Energy and Distribution of Isomers in the Chiral Cu<sub>13</sub> Cluster

Cesar Castillo-Quevedo <sup>1</sup>, Carlos Emiliano Buelna-Garcia <sup>2,3</sup>, Edgar Paredes-Sotelo <sup>2</sup>, Eduardo Robles-Chaparro <sup>4</sup>, Edgar Zamora-Gonzalez <sup>5</sup>, Martha Fabiola Martin-del-Campo-Solis <sup>1</sup>, Jesus Manuel Quiroz-Castillo <sup>2</sup>, Teresa del-Castillo-Castro <sup>2</sup>, Gerardo Martínez-Guajardo <sup>6</sup>, Aned de-Leon-Flores <sup>4</sup>, Manuel Cortez-Valadez <sup>7</sup>, Filiberto Ortiz-Chi <sup>8</sup>, Tulio Gaxiola <sup>9</sup>, Santos Jesus Castillo <sup>7</sup>, Alejandro Vásquez-Espinal <sup>10</sup>, Sudip Pan <sup>11</sup> and Jose Luis Cabellos <sup>7,\*</sup>

- <sup>1</sup> Departamento de Fundamentos del Conocimiento, Centro Universitario del Norte, Universidad de Guadalajara, Carretera Federal No. 23, Km. 191, C.P., Colotlán 46200, Jalisco, Mexico; castillo.quevedo@cunorte.udg.mx (C.C.-Q.); mfmartindelfcampo@cunorte.udg.mx (M.F.M.-d.-C.-S.)
  - <sup>2</sup> Departamento de Investigación en Polímeros y Materiales, Edificio 3G, Universidad de Sonora, Hermosillo 83000, Sonora, Mexico; a209205768@unison.mx (C.E.B.-G.); a213216667@unison.mx (E.P.-S.); jesus.quiroz@unison.mx (J.M.Q.-C.); teresa.delcastillo@unison.mx (T.d.-C.-C.)
  - <sup>3</sup> Organización Científica y Tecnológica del Desierto, Hermosillo 83150, Sonora, Mexico
  - <sup>4</sup> Departamento de Ciencias Químico Biológicas, Edificio 5A, Universidad de Sonora, Hermosillo 83000, Sonora, Mexico; a214201767@unison.mx (E.R.-C.); aned.deleon@unison.mx (A.-d.L.-F.)
  - <sup>5</sup> Departamento de Bienestar y Desarrollo Sustentable, Centro Universitario del Norte, Universidad de Guadalajara, Carretera Federal No. 23, Km. 191, C.P., Colotlán 46200, Jalisco, Mexico; edgar.zamora@cunorte.udg.mx
  - <sup>6</sup> Unidad Académica de Ciencias Químicas, Área de Ciencias de la Salud, Universidad Autónoma de Zacatecas, Km. 6 carretera Zacatecas-Guadalajara s/n, Ejido La Escondida C. P., Zacatecas 98160, Zac, Mexico; germtzguajardo@uaz.edu.mx
  - <sup>7</sup> Departamento de Investigación en Física, Edificio 3M, Universidad de Sonora, Hermosillo 83000, Sonora, Mexico; jose.cortez@unison.mx (M.C.-V.); santos.castillo@unison.mx (S.J.C.)
  - <sup>8</sup> CONACYT-Universidad Juárez Autónoma de Tabasco, Centro de Investigación de Ciencia y Tecnología Aplicada de Tabasco, Cunduacán 86690, Tabasco, Mexico; fortiz@conacyt.mx
  - <sup>9</sup> Facultad de Ciencias Físico-Matemáticas de la Universidad Autónoma de Sinaloa, Sinaloa 80010, Mexico; tuliogax@uas.edu.mx
  - <sup>10</sup> Computational and Theoretical Chemistry Group Departamento de Ciencias Químicas, Facultad de Ciencias Exactas, Universidad Andres Bello, Republica 498, Santiago 8370035, Chile; a.vasquezespinal@uandresbello.edu
  - <sup>11</sup> Fachbereich Chemie, Philipps-Universität Marburg, Hans-Meerwein-Straße 4, Marburg 35032; pans@chemie.uni-marburg.de
- \* Correspondence: jose.cabellos@unison.mx

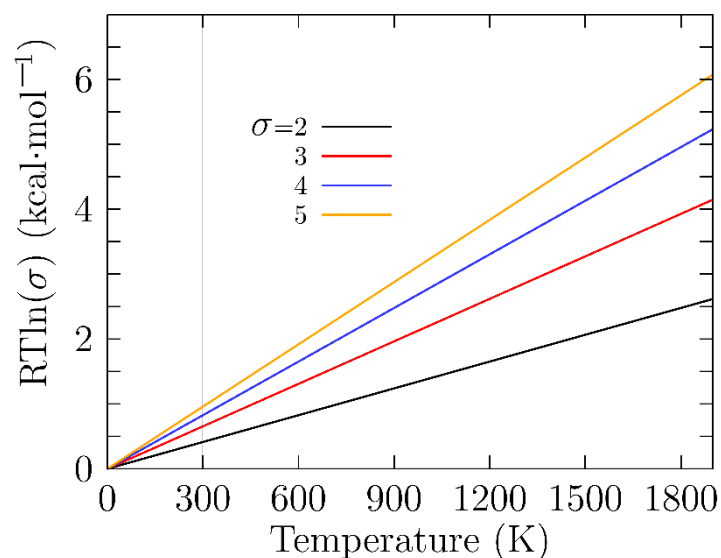

**Figure S1.** (Color online) shows the  $RT\ln\sigma$  factor as a function of temperature and for different symmetry numbers. For our optimized low-energy isomers with  $C_2$  symmetry, the symmetry number is 2, so the Gibbs free energy at 298.15 K with and without symmetry will differ by 0.41 kcal/mol regardless of the DFT method.

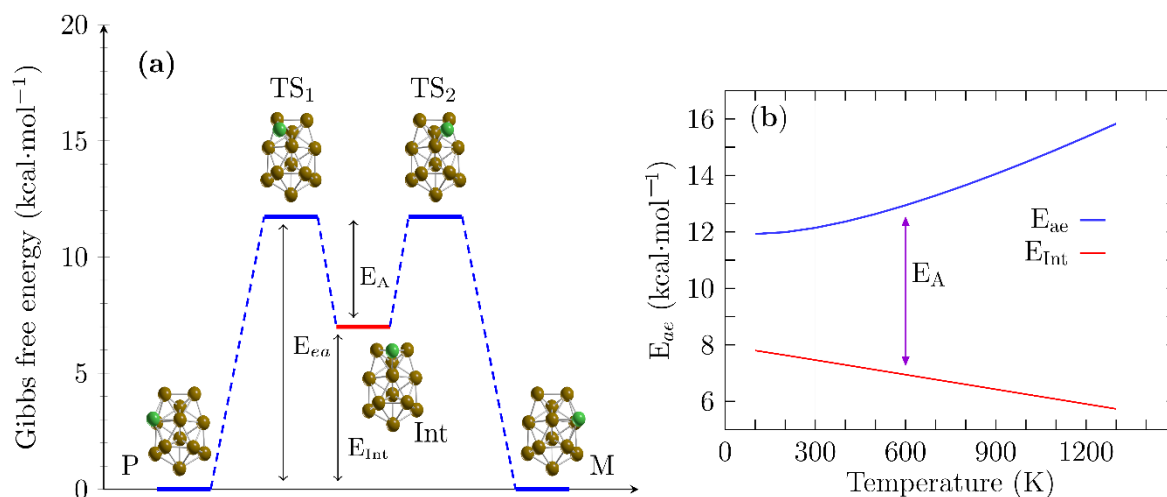

**Figure S2a.** (Color online) Figure (a) shows the energy profile of a chemical reaction (route A) with two symmetric transition states (TS1, TS2) and one intermediate (Int) for the interconversion between the lowest energy P and M enantiomers.

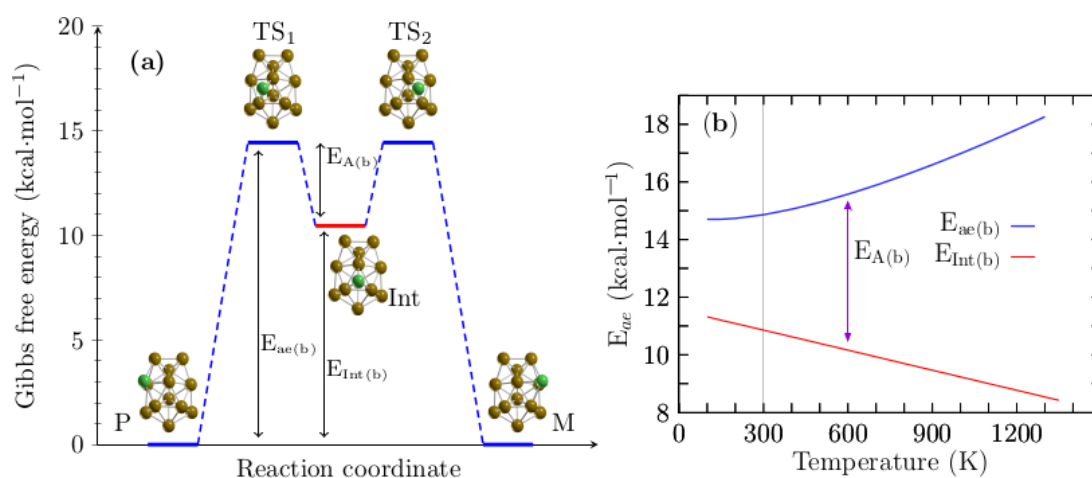

**Figure S2b.** (Color online) Figure (a) shows the energy profile of a chemical reaction (route B) with two symmetric transition states (TS1, TS2) and one intermediate (Int) for the interconversion between the lowest energy P and M enantiomers.

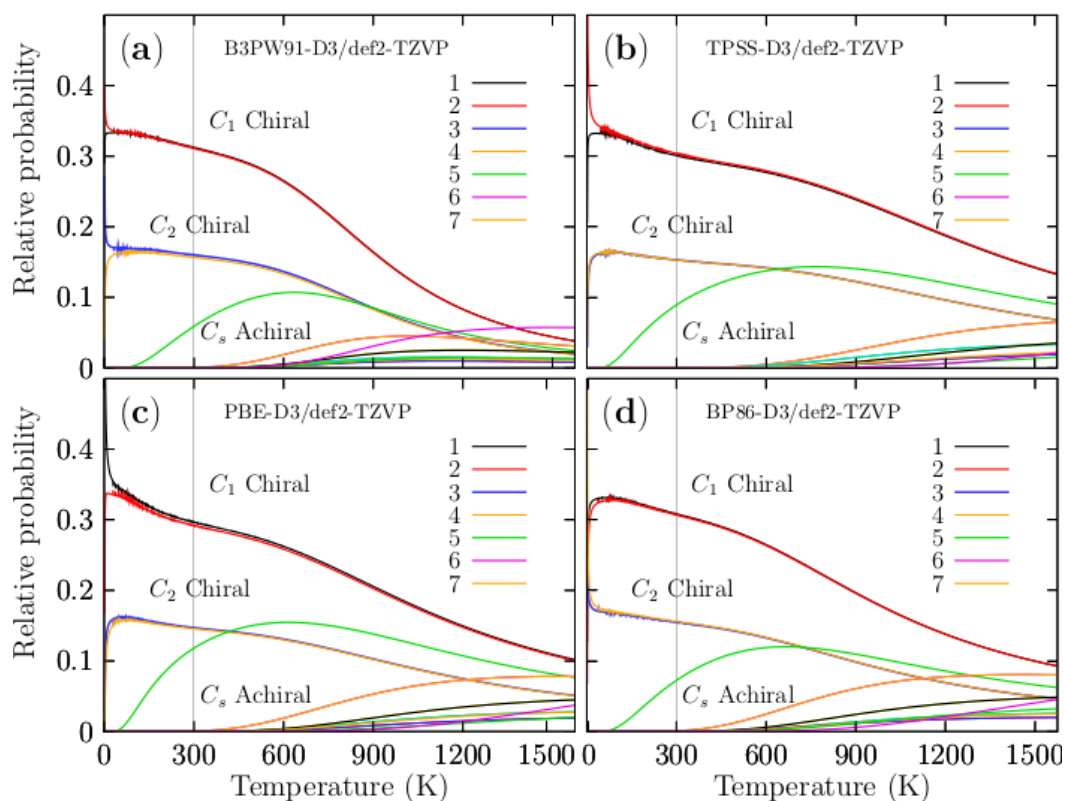

**Figure S3.** (Color online) Probability of occurrence or thermal population for all isomers at temperatures ranging from 20 to 1500 K computed with DFT functionals: (a) B3PW91; (b) TPSS; (c) PBE; (d) BP86. The influence of functional over the thermal population is not significant. The red and black solid lines depict the probability occurrence of the putative chiral global minimum with symmetry  $C_1$  and strongly dominate at room temperature. The bulk melting temperature of copper is 1358 K; thus, our results below this temperature are consistent and describe correctly the  $\text{Cu}_{13}$  system.

#### XYZ atomic coordinates

13

0.000000000

Cu -0.990009000000 0.202990000000 0.910273000000

Cu 0.989148000000 0.203204000000 -0.910494000000

Cu 1.307754000000 0.817211000000 1.506707000000

Cu -0.756524000000 -1.521352000000 -1.012184000000

Cu -2.995439000000 -0.494575000000 -0.267184000000

Cu -0.000551000000 2.308713000000 -0.000120000000

Cu 1.705678000000 -2.128579000000 -1.124758000000

Cu 2.995766000000 -0.493776000000 0.267529000000

Cu 0.756822000000 -1.521006000000 1.012214000000

Cu -1.308834000000 0.816218000000 -1.506262000000

Cu -1.705107000000 -2.129263000000 1.124856000000

Cu 2.516484000000 1.969366000000 -0.285914000000

Cu -2.515188000000 1.970848000000 0.285338000000

13

0.0

Cu 2.996448000000 -0.496001000000 -0.267592000000  
Cu 0.001667000000 2.310547000000 0.000676000000  
Cu -2.995952000000 -0.494433000000 0.269213000000  
Cu -1.306808000000 0.815254000000 1.507348000000  
Cu -1.705730000000 -2.124433000000 -1.131339000000  
Cu -0.758682000000 -1.523652000000 1.008973000000  
Cu 1.703409000000 -2.124451000000 1.131525000000  
Cu -0.990301000000 0.204731000000 -0.908935000000  
Cu 0.988794000000 0.203684000000 0.907576000000  
Cu 0.757650000000 -1.522732000000 -1.009666000000  
Cu 1.307287000000 0.814164000000 -1.507737000000  
Cu -2.516824000000 1.970263000000 -0.282984000000  
Cu 2.519042000000 1.967060000000 0.282942000000

13

0.0

Cu 0.000000000000 1.344973000000 0.202955000000  
Cu 0.000000000000 -1.344973000000 0.202955000000  
Cu -1.995454000000 0.058043000000 0.817297000000  
Cu 1.256550000000 -0.129438000000 -1.520715000000  
Cu 2.225189000000 2.023127000000 -0.494441000000  
Cu 0.000000000000 0.000000000000 2.309851000000  
Cu -0.329078000000 -2.016616000000 -2.128802000000  
Cu -2.225189000000 -2.023127000000 -0.494441000000  
Cu -1.256550000000 0.129438000000 -1.520715000000  
Cu 1.995454000000 -0.058043000000 0.817297000000  
Cu 0.329078000000 2.016616000000 -2.128802000000  
Cu -1.493610000000 -2.046117000000 1.968780000000  
Cu 1.493610000000 2.046117000000 1.968780000000

13

0.0

Cu 2.223762000000 -2.025867000000 -0.495217000000  
Cu 0.000000000000 0.000000000000 2.310547000000  
Cu -2.223762000000 2.025867000000 -0.495217000000  
Cu -1.994460000000 -0.056469000000 0.814709000000  
Cu -0.319078000000 2.020862000000 -2.124442000000  
Cu -1.256256000000 -0.123944000000 -1.523192000000  
Cu 0.319078000000 -2.020862000000 -2.124442000000  
Cu 0.000000000000 1.343180000000 0.204207000000  
Cu 0.000000000000 -1.343180000000 0.204207000000

Cu 1.256256000000 0.123944000000 -1.523192000000  
Cu 1.994460000000 0.056469000000 0.814709000000  
Cu -1.494157000000 2.046351000000 1.968662000000  
Cu 1.494157000000 -2.046351000000 1.968662000000  
13  
0.0  
Cu 1.498297000000 1.657328000000 0.000000000000  
Cu 1.003341000000 -0.375964000000 1.253814000000  
Cu -0.138045000000 -2.403407000000 -2.119815000000  
Cu -0.138045000000 -2.403407000000 2.119815000000  
Cu -1.225346000000 -0.173883000000 -2.147529000000  
Cu -0.900082000000 1.025489000000 0.000000000000  
Cu 1.137299000000 -2.548857000000 0.000000000000  
Cu -0.996810000000 -1.431609000000 0.000000000000  
Cu -0.265552000000 3.375491000000 0.000000000000  
Cu 0.123475000000 1.914332000000 -2.038291000000  
Cu 0.123475000000 1.914332000000 2.038291000000  
Cu 1.003341000000 -0.375964000000 -1.253814000000  
Cu -1.225346000000 -0.173883000000 2.147529000000  
13  
0.0  
Cu -2.672360000000 1.778684000000 -0.271124000000  
Cu -3.399266000000 -0.537869000000 0.118950000000  
Cu 2.453641000000 -2.035844000000 -0.344120000000  
Cu 2.955873000000 0.155715000000 0.606246000000  
Cu -1.314926000000 0.387596000000 1.216907000000  
Cu 2.191817000000 2.289492000000 -0.506953000000  
Cu -0.290915000000 2.041620000000 -0.611068000000  
Cu 1.169953000000 0.094376000000 -1.027696000000  
Cu 0.922863000000 1.295301000000 1.344417000000  
Cu -1.333031000000 -0.173969000000 -1.163374000000  
Cu 0.717221000000 -1.131205000000 1.124371000000  
Cu -1.548008000000 -2.024378000000 0.624325000000  
Cu 0.147137000000 -2.139519000000 -1.110881000000
